# Supplementary material
Source: publisher site journal article supplement (https://www.dovepress.com/article/246905)
Supplement: Supplementary file 1 [file get_supplementary_file.php]

**Table S1.** Patient characteristic (142 patients with 151 eye side)

| Variables | N (%) or Mean ± SD |
| --- | --- |
| Sex |  |
| Male | 79 (55.63) |
| Female | 63 (44.37) |
| Age (years) | 57.80 ± 18.84 (range 19–92) |

**Table S2.** Characteristics of the three groups (by number of eye side)

| Variables | Total  N (%) | Stent group  (N =28) | Ligature group  (n =118) | Combined group  (N =5) | p-value |
| --- | --- | --- | --- | --- | --- |
| Eye side, n (%) | 151 (100) |  |  |  | 0.526 |
| Right (OD) | 79 (52.32) | 14 (50.00) | 61 (51.69) | 4 (80.00) |  |
| Left | 72 (47.68) | 14 (50.00) | 57 (48.31) | 1 (20.00) |  |
| Diagnosis | 151 (100) |  |  |  | 0.311 |
| POAG | 100 (66.23) | 22 (78.57) | 75 (63.56) | 3 (60.00) |  |
| Others | 51 (33.77) | 6 (21.43) | 43 (36.44) | 2 (40.00) |  |
| Number of previous surgery, Median (IQR) | 3 (2-4) | 3 (2-4) | 3 (2-3) | 2 (2-3) | 0.393 |
| Phakic status | 151 (100) |  |  |  | 0.738 |
| Pseudophakia | 102 (67.55) | 19 (67.86) | 80 (67.80) | 3 (60.00) |  |
| Phakia | 27 (17.88) | 5 (17.86) | 20 (16.95) | 2 (40.00) |  |
| Aphakia | 22 (14.57) | 4 (14.29) | 18 (15.25) | 0 |  |
| Preoperative LogMAR BCVA, median (IQR) | 0.88 (0.40-2.00) | 0.79 (0.35-1.30) | 0.88 (0.40-2.12) | 1.30  (1.30-2.30) | 0.343 |
| Pre-operative IOP, mean ± SD | 24.24±8.98 | 22.89±9.87 | 24.62±8.85 | 22.80±7.15 | 0.618 |
| Pre-operative number of medications, mean ± SD | 4.11±0.55 | 4.46±0.79 | 4.05±0.64 | 3.60±0.55 | 0.004 |
| Implant location | 151 (100) |  |  |  | 0.244 |
| Superonasal | 20 (13.25) | 6 (21.43) | 14 (11.86) | 0 |  |
| Superotemporal | 105 (69.54) | 21 (75.00) | 80 (67.80) | 4 (80.00) |  |
| Inferonasal | 13 (8.61) | 1 (3.57) | 12 (10.17) | 0 |  |
| Inferotemporal | 13 (8.61) | 0 | 12 (10.17) | 1 (20.00) |  |
| Tube fixation | 151 (100) |  |  |  | 0.579 |
| Angle | 135 (89.40) | 25 (89.29) | 105 (88.98) | 5 (100.00) |  |
| Sulcus | 14 (9.27) | 2 (7.14) | 12 (10.17) | 0 |  |
| Pars plana | 2 (1.32) | 1 (3.57) | 1 (0.85) | 0 |  |
| Baerveldt glaucoma implant model | 151 (100) |  |  |  | <0.001 |
| 350 | 126 (83.44) | 16 (57.14) | 109 (92.37) | 1 (20.00) |  |
| 250 | 25 (16.56) | 12 (42.86) | 9 (7.63) | 4 (80.00) |  |
| Abbreviations: POAG, primary open-angle glaucoma; BCVA, best corrected visual acuity.  Comparison among the three groups of tube modification using ANOVA. | | | | | | |

**Table S3.** Follow-up period and treatment outcomes

| Variables | Stent group  N= 28 | Ligature group  N = 118 | Combined group  N = 5 | P–value |
| --- | --- | --- | --- | --- |
| BCVA, median (IQR) |  |  |  |  |
| 1 month (N = 147) | 1.00  (0.59–2.15) | 1.15  (0.51–2.90) | 1.30  (1.15–2.90) | 0.658 |
|  | N=28 | N = 114 | N = 5 |  |
| 6 months (N = 126) | 1.00  (0.62–2.00) | 1.00  (0.46–2.60) | 1.09  (0.64–2.15) | 0.853 |
|  | N =27 | N = 95 | N = 4 |  |
| 12 months (N = 98) | 0.95  (0.43–2.21) | 0.89  (0.46–2.00) | – | 0.811 |
|  | N = 24 | N =74 |  |  |
| 36 months (N = 39) | 0.64  (0.40–2.30) | 1.00  (0.62–3.00) | – | 0.350 |
|  | N = 17 | N = 22 |  |  |
| 60 months (N = 10) | 1.82  (0.37–2.60) | 0.88  (0.88–0.88) | – | 0.602 |
|  | N = 9 | N = 1 |  |  |
| IOP, median(IQR) |  |  |  |  |
| 1 month (N = 148) | 17.00  (11.50–23.50) | 14.00  (10.00–18.00) | 16.00  (10.00–17.00) | 0.108 |
|  | N = 28 | N = 115 | N = 5 |  |
| 6 months (N = 126) | 12.00  (9.00–15.00) | 14.00  (10.00–17.00) | 13.50  (12.00–17.50) | 0.421 |
|  | N = 27 | N = 95 | N = 4 |  |
| 12 months (N = 97) | 13.50  (11.50–16.00) | 12.00  (10.00–17.00) | – | 0.509 |
|  | N = 24 | N = 73 |  |  |
| 36 months (N = 37) | 12.00  (11.50–15.00) | 14.00  (12.00–17.00) | – | 0.417 |
|  | N = 16 | N = 21 |  |  |
| 60 months (N = 10) | 19.0  (12.00–21.00) | 23.00  (23.00–23.00) | – | 0.384 |
|  | N = 9 | N = 1 |  |  |
| Follow–up period (months) |  |  |  |  |
| Median (IQR) | 58.05  (18.97–65.38) | 18.07  (10.57–33.60) | 12.47  (12.33–14.33) | <0.001 |
| Treatment failure | N = 7 (25.00) | N = 27 (22.88) | N = 1 (20.00) | 0.278 |
| Failure time (months) |  |  |  |  |
| median (IQR) | 27.30  (2.53–56.07) | 4.53  (3.17-23.47) | 1 | 0.106 |
| Abbreviations: BCVA, best corrected visual acuity; POAG, primary open-angle glaucoma. | | | | |
